# Supplementary material for: Oxylipin Diversity in the Diatom Family Leptocylindraceae Reveals DHA Derivatives in Marine Diatoms
Source: Mar Drugs. 2014 Jan 17;12(1):368–84. doi: 10.3390/md12010368 (PMC3917278; doi:10.3390/md12010368)

## Supplementary Information

**Table S1.** List of strains used in the study, their date of isolation and SSU rDNA GenBank accession numbers.

**Table S2.** Seasonality of *Leptocylindraceae* species with their bloom time and LOX type.

**Figure S1.** Typical growth curves established by cell density for *Leptocylindrus* species and *T. belgicus* ( $n = 3$ ). Cell densities were estimated by counting cell number every day, using a Sedgwick-Rafter counting chamber.

**Figure S2.** LC-MS chromatograms of (A) *L. aporus* B724; (B) *L. convexus* B783; (C) *L. convexus* B778; (D) *L. danicus* B707; (E) *L. hargravesii* B781; (F) *T. belgicus* B755.

**Table S1.** List of strains used in the study, their date of isolation and SSU rDNA GenBank accession numbers.

| Strain                            | Date of Isolation | SSU rDNA |
|-----------------------------------|-------------------|----------|
| <i>Leptocylindrus aporus</i>      |                   |          |
| SZN-B727                          | 03/08/2010        | KC814810 |
| SZN-B764                          | 18/11/2010        | KC814810 |
| SZN-B651                          | 21/08/2010        | KC814810 |
| <i>Leptocylindrus convexus</i>    |                   |          |
| SZN-B778                          | 25/01/2011        | KC814811 |
| SZN-B783                          | 25/01/2011        | KC814811 |
| <i>Leptocylindrus danicus</i>     |                   |          |
| SZN-B707                          | 15/02/2010        | KC814808 |
| SZN-B715                          | 15/06/2010        | KC814808 |
| <i>Leptocylindrus hargravesii</i> |                   |          |
| SZN-B772                          | 21/12/2010        | KC814809 |
| SZN-B781                          | 25/01/2011        | KC814809 |
| <i>Tenuicylindrus belgicus</i>    |                   |          |
| SZN-B739                          | 02/10/2010        | KC814812 |
| SZN-B755                          | 19/10/2010        | KC894152 |

**Table S2.** Seasonality of *Leptocylindraceae* species with their bloom time and LOX type.

| Species               | Season  | Peak Months | Max Cell No. Cells L <sup>-1</sup> |         | Oxylipin Pathway |                                                              |
|-----------------------|---------|-------------|------------------------------------|---------|------------------|--------------------------------------------------------------|
| <i>L. aporus</i>      | Jul–Oct | Jul–Aug     | <10 <sup>5</sup> –10 <sup>6</sup>  | counted | 14-LOX           |                                                              |
| <i>L. convexus</i>    | Dec–Mar | Jan–Feb     | <10 <sup>2</sup> –10 <sup>3</sup>  | guessed | 18-LOX           | probably mixed with <i>L. danicus</i>                        |
| <i>L. danicus</i>     | Nov–Jul | May–Jun     | <10 <sup>4</sup> –10 <sup>5</sup>  | counted | 15-LOX           | probably mixed with <i>L. convexus</i>                       |
| <i>L. hargravesii</i> | Dec–Jan | Dec–Jan     | <10 <sup>2</sup>                   | guessed | 15-LOX           | probably mixed with <i>L. danicus</i> and <i>L. convexus</i> |
| <i>T. belgicus</i>    | Aug–Oct | Sept–Oct    | <10 <sup>4</sup> –10 <sup>5</sup>  | counted | 5-LOX            |                                                              |

**Figure S1.** Typical growth curves established by cell density for *Leptocylindrus* species and *T. belgicus* (*n* = 3). Cell densities were estimated by counting cell number every day, using a Sedgwick-Rafter counting chamber. Arrowheads indicate the stage at which cells were harvested for analysis (Stationary phase).

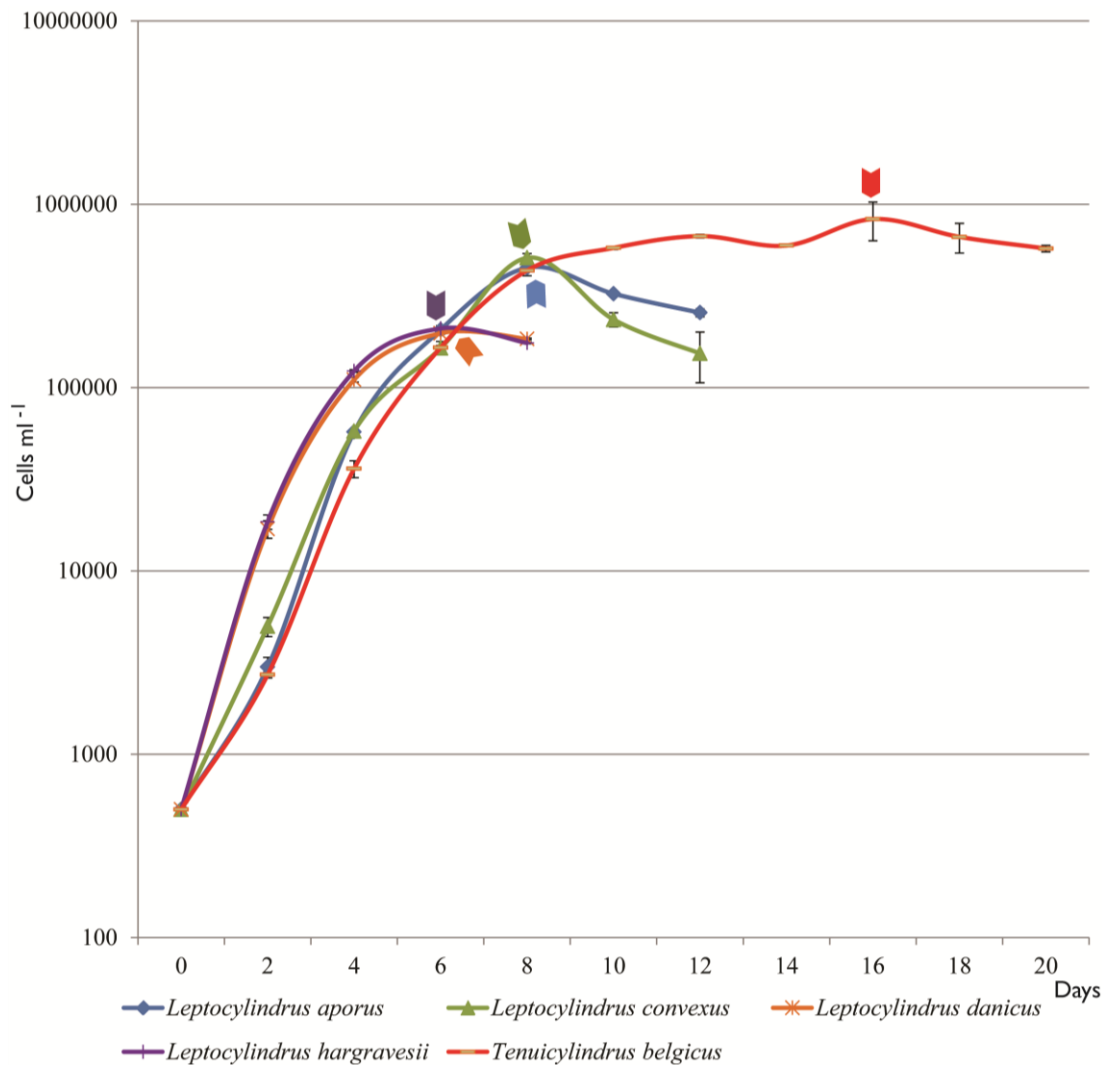

**Figure S2.** LC-MS chromatograms of (A) *L. aporus* B724; (B) *L. convexus* B783; (C) *L. convexus* B778; (D) *L. danicus* B707; (E) *L. hargravesii* B781; (F) *T. belgicus* B755.

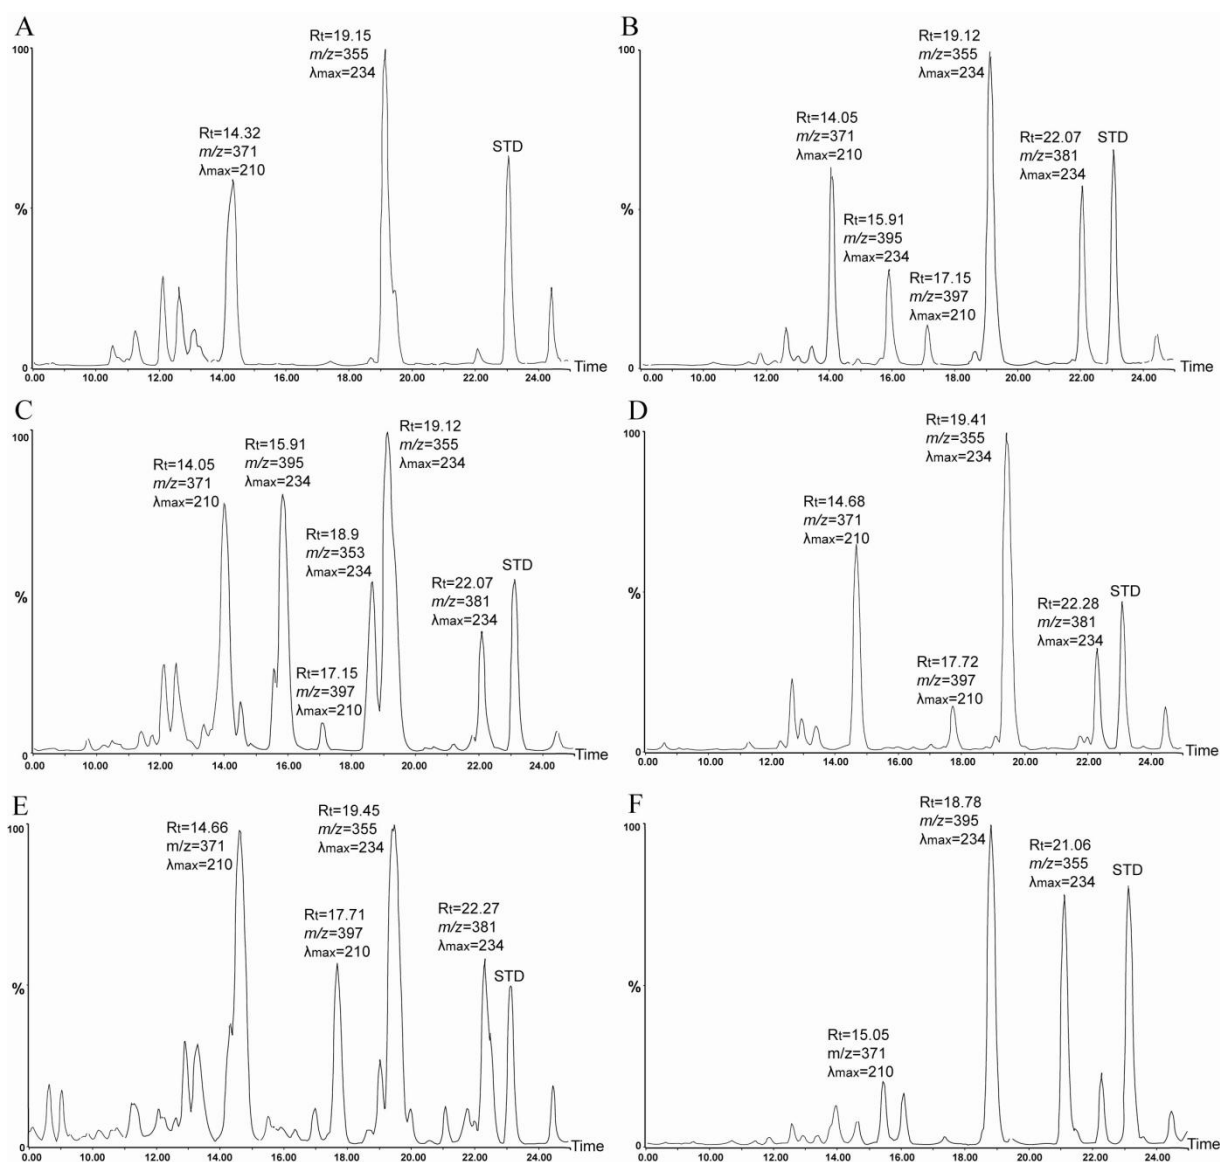

Supplement: Supplementary File 1 — Supplementary Information (PDF, 474 KB) [file marinedrugs-12-00368-s001.pdf]
